# Supplementary material
Source: PubMed Central journal article supplement (PMC8755857)
Supplement: NIHMS1732738-supplement-2.pdf [file NIHMS1732738-supplement-2.pdf]

Supplemental Appendix

**Summary of available clinical data on potential bilateral endophthalmitis cases in the ISBCS group**

Notes:

For each patient, visual acuity, intraocular pressure, and all diagnoses and procedures are reported by day relative to the day of first cataract surgery in the IRIS database. The day of first cataract surgery is reported as Day 0.

If a diagnosis, procedure or VA measurement was reported as bilateral or unspecified, it was printed for both eyes. A (+) indicates the diagnosis, procedure or result was bilateral and a (\*) indicates the laterality was unspecified.

Visual Acuity is reported as type (BC for best corrected, UC for uncorrected) followed by the modified logMAR result with the modified Snellen result in parentheses.

**Case 1:**

|               | Right eye                                                                                                                      | Left eye |
|---------------|--------------------------------------------------------------------------------------------------------------------------------|----------|
| <b>Day -9</b> |                                                                                                                                |          |
| <b>VA</b>     | N/A                                                                                                                            | N/A      |
| <b>IOP</b>    | N/A                                                                                                                            | N/A      |
| <b>Dx</b>     | Senile nuclear sclerosis (366.16)*<br>Other specified pre-operative examination (V72.83)*                                      |          |
| <b>Px</b>     | Ophthalmic biometry (92136)+<br>None (None)+<br>Corneal topography (92025)*<br>Office/outpatient visit est (99213)*            |          |
| <b>Day -1</b> |                                                                                                                                |          |
| <b>VA</b>     | N/A                                                                                                                            | N/A      |
| <b>IOP</b>    | N/A                                                                                                                            | N/A      |
| <b>Dx</b>     | Anatomical narrow angle borderline glaucoma (365.02)*<br>Severe stage glaucoma (365.73)*<br>Senile nuclear sclerosis (366.16)* |          |
| <b>Px</b>     | Ophthalmic biometry (92136)                                                                                                    | N/A      |
| <b>Day 0</b>  |                                                                                                                                |          |
| <b>VA</b>     | N/A                                                                                                                            | N/A      |

|              |                                                                                                                                                                                         |                                    |
|--------------|-----------------------------------------------------------------------------------------------------------------------------------------------------------------------------------------|------------------------------------|
| IOP          | N/A                                                                                                                                                                                     | N/A                                |
| Dx           | Anatomical narrow angle borderline glaucoma (365.02)*<br>Severe stage glaucoma (365.73)*<br>Senile nuclear sclerosis (366.16)*                                                          |                                    |
| Px           | Ciliary endoscopic ablation (66711)+<br><b>Cataract surg w/iol 1 stage (66984)+</b><br>Anesth lens surgery (00142)+<br>None (None)*                                                     |                                    |
| <b>Day 1</b> |                                                                                                                                                                                         |                                    |
| VA           | UC -0.3 (20/40)                                                                                                                                                                         | N/A                                |
| IOP          | 18                                                                                                                                                                                      | N/A                                |
| Dx           | Lens replaced by other means (V43.1)*                                                                                                                                                   |                                    |
| Px           | Postop follow-up visit (99024)*                                                                                                                                                         |                                    |
| <b>Day 6</b> |                                                                                                                                                                                         |                                    |
| VA           | UC -3 (HM)<br>BC -3 (HM)                                                                                                                                                                | UC -0.3 (20/40)<br>BC -0.3 (20/40) |
| IOP          | 13                                                                                                                                                                                      | 22                                 |
| Dx           | Acute endophthalmitis (360.01)*<br>Senile nuclear sclerosis (366.16)*<br>Preglaucoma, unspecified (365.00)*<br>Vitreous degeneration (379.21)*<br>Lens replaced by other means (V43.1)* |                                    |
| Px           | Removal of inner eye fluid (67036)                                                                                                                                                      | N/A                                |
|              | Anesth vitreoretinal surg (00145)+<br>Cptr ophth dx img post segmt (92134)*<br>Postop follow-up visit (99024)*                                                                          |                                    |
| <b>Day 7</b> |                                                                                                                                                                                         |                                    |
| VA           | UC -3 (HM)                                                                                                                                                                              | N/A                                |
| IOP          | 18                                                                                                                                                                                      | N/A                                |
| Dx           | Acute endophthalmitis (360.01)*                                                                                                                                                         |                                    |
| Px           | Postop follow-up visit (99024)*                                                                                                                                                         |                                    |
| <b>Day 8</b> |                                                                                                                                                                                         |                                    |

|               |                                                                                            |                                     |
|---------------|--------------------------------------------------------------------------------------------|-------------------------------------|
| <b>VA</b>     | UC -3 (HM)                                                                                 | UC -0.18 (20/30)                    |
| <b>IOP</b>    | 12                                                                                         | 11                                  |
| <b>Dx</b>     | Acute endophthalmitis (360.01)*                                                            |                                     |
| <b>Px</b>     | Postop follow-up visit (99024)*                                                            |                                     |
| <b>Day 14</b> |                                                                                            |                                     |
| <b>VA</b>     | UC -0.7 (20/100)<br>BC -0.48 (20/60)<br>BC -0.6 (20/80)                                    | UC -0.18 (20/30)                    |
| <b>IOP</b>    | 10                                                                                         | 11                                  |
| <b>Dx</b>     | Open angle with borderline findings, low risk (365.01)                                     | Incipient senile cataract (366.12)  |
|               | Acute endophthalmitis (360.01)+                                                            |                                     |
| <b>Px</b>     | Postop follow-up visit (99024)*                                                            |                                     |
| <b>Day 21</b> |                                                                                            |                                     |
| <b>VA</b>     | UC -0.7 (20/100)<br>BC -0.3 (20/40)                                                        | UC -0.1 (20/25)                     |
| <b>IOP</b>    | 10                                                                                         | 13                                  |
| <b>Dx</b>     | N/A                                                                                        | Incipient senile cataract (366.12)  |
|               | Open angle with borderline findings, low risk (365.01)+<br>Acute endophthalmitis (360.01)* |                                     |
| <b>Px</b>     | Postop follow-up visit (99024)*                                                            |                                     |
| <b>Day 47</b> |                                                                                            |                                     |
| <b>VA</b>     | UC -0.7 (20/100)<br>BC -0.18 (20/30)                                                       | UC -0.3 (20/40)<br>BC -0.18 (20/30) |
| <b>IOP</b>    | 12                                                                                         | 23                                  |
| <b>Dx</b>     | Acute endophthalmitis (360.01)                                                             | Incipient senile cataract (366.12)  |
|               | Open angle with borderline findings, low risk (365.01)+                                    |                                     |
| <b>Px</b>     | Postop follow-up visit (99024)*                                                            |                                     |

**Case 2:**

|               | Right eye                                         | Left eye                                        |
|---------------|---------------------------------------------------|-------------------------------------------------|
| <b>Day -9</b> |                                                   |                                                 |
| VA            | N/A                                               | N/A                                             |
| IOP           | N/A                                               | N/A                                             |
| Dx            | Age-related nuclear cataract, bilateral (H25.13)+ |                                                 |
| Px            | Ophthalmic biometry (92136)*                      |                                                 |
| <b>Day 0</b>  |                                                   |                                                 |
| VA            | N/A                                               | N/A                                             |
| IOP           | N/A                                               | N/A                                             |
| Dx            | Age-related nuclear cataract, right eye (H25.11)  | N/A                                             |
| Px            | Cataract surg w/iol 1 stage (66984)*              |                                                 |
| <b>Day 1</b>  |                                                   |                                                 |
| VA            | UC -0.4 (20/50)<br>BC -0.18 (20/30)               | N/A                                             |
| IOP           | 18                                                | N/A                                             |
| Dx            | Age-related nuclear cataract, right eye (H25.11)  | N/A                                             |
|               | Presence of intraocular lens (Z96.1)*             |                                                 |
| Px            | Postop follow-up visit (99024)*                   |                                                 |
| <b>Day 7</b>  |                                                   |                                                 |
| VA            | N/A                                               | N/A                                             |
| IOP           | N/A                                               | N/A                                             |
| Dx            | N/A                                               | Age-related nuclear cataract, left eye (H25.12) |
| Px            | Cataract surg w/iol 1 stage (66984)+              |                                                 |
| <b>Day 8</b>  |                                                   |                                                 |

|               |                                                                                                                                                                                                                                                                                                                   |                                                                                                                                                                                        |
|---------------|-------------------------------------------------------------------------------------------------------------------------------------------------------------------------------------------------------------------------------------------------------------------------------------------------------------------|----------------------------------------------------------------------------------------------------------------------------------------------------------------------------------------|
| <b>VA</b>     | UC -0.54 (20/70)<br>BC -0.3 (20/40)                                                                                                                                                                                                                                                                               | UC -0.18 (20/30)                                                                                                                                                                       |
| <b>IOP</b>    | 14                                                                                                                                                                                                                                                                                                                | 19                                                                                                                                                                                     |
| <b>Dx</b>     | N/A                                                                                                                                                                                                                                                                                                               | Age-related nuclear cataract, left eye<br>(H25.12)                                                                                                                                     |
|               | Presence of intraocular lens (Z96.1)*                                                                                                                                                                                                                                                                             |                                                                                                                                                                                        |
| <b>Px</b>     | Postop follow-up visit (99024)*                                                                                                                                                                                                                                                                                   |                                                                                                                                                                                        |
| <b>Day 10</b> |                                                                                                                                                                                                                                                                                                                   |                                                                                                                                                                                        |
| <b>VA</b>     | UC -0.4 (20/50)<br>BC -0.3 (20/40)                                                                                                                                                                                                                                                                                | UC -3 (LP)                                                                                                                                                                             |
| <b>IOP</b>    | 14                                                                                                                                                                                                                                                                                                                | 20                                                                                                                                                                                     |
| <b>Dx</b>     | N/A                                                                                                                                                                                                                                                                                                               | Acute endophthalmitis (1493002)<br>Acute endophthalmitis (360.01)<br>Age-related nuclear cataract, left eye<br>(H25.12)<br>Unspecified purulent endophthalmitis, left<br>eye (H44.002) |
|               | Artificial lens in position (225899000)+<br>Glaucoma (23986001)+<br>Lens capsule in pseudophakia finding (247072007)+<br>Artificial lens in situ (309523001)+<br>Unspecified glaucoma (365.9)+<br>Unspecified glaucoma (H40.9)+<br>Lens replaced by other means (V43.1)+<br>Presence of intraocular lens (Z96.1)+ |                                                                                                                                                                                        |
| <b>Px</b>     | Release of eye fluid (67015)*<br>Injection eye drug (67028)*<br>Postop follow-up visit (99024)*<br>Injection, ceftazidime, per 500 mg (J0713)*<br>Injection, vancomycin hcl, 500 mg (J3370)*                                                                                                                      |                                                                                                                                                                                        |
| <b>Day 13</b> |                                                                                                                                                                                                                                                                                                                   |                                                                                                                                                                                        |
| <b>VA</b>     | BC -0.4 (20/50)                                                                                                                                                                                                                                                                                                   | N/A                                                                                                                                                                                    |
| <b>IOP</b>    | 17                                                                                                                                                                                                                                                                                                                | 7                                                                                                                                                                                      |
| <b>Dx</b>     | N/A                                                                                                                                                                                                                                                                                                               | Acute endophthalmitis (1493002)<br>Acute endophthalmitis (360.01)<br>Unspecified purulent endophthalmitis, left<br>eye (H44.002)                                                       |

|               |                                                                                                                                                                                                                                                                                                                                              |                                                                                                                               |
|---------------|----------------------------------------------------------------------------------------------------------------------------------------------------------------------------------------------------------------------------------------------------------------------------------------------------------------------------------------------|-------------------------------------------------------------------------------------------------------------------------------|
|               | Artificial lens in position (225899000)+<br>Glaucoma (23986001)+<br>Lens capsule in pseudophakia finding (247072007)+<br>Artificial lens in situ (309523001)+<br>Unspecified glaucoma (365.9)+<br>Unspecified glaucoma (H40.9)+<br>Lens replaced by other means (V43.1)+<br>Presence of intraocular lens (Z96.1)+<br>None (428341000124108)* |                                                                                                                               |
| <b>Px</b>     | N/A                                                                                                                                                                                                                                                                                                                                          | Ophth us b w/non-quant a (76512)                                                                                              |
|               | Eye exam&tx estab pt 1/>vst (92014)*                                                                                                                                                                                                                                                                                                         |                                                                                                                               |
| <b>Day 14</b> |                                                                                                                                                                                                                                                                                                                                              |                                                                                                                               |
| <b>VA</b>     | UC -0.54 (20/70)                                                                                                                                                                                                                                                                                                                             | UC -3 (LP)                                                                                                                    |
| <b>IOP</b>    | 19                                                                                                                                                                                                                                                                                                                                           | 6                                                                                                                             |
| <b>Dx</b>     | Unspecified purulent endophthalmitis, right eye (H44.001)<br>Presence of intraocular lens (Z96.1)                                                                                                                                                                                                                                            | Unspecified purulent endophthalmitis, left eye (H44.002)                                                                      |
|               | Age-related nuclear cataract, bilateral (H25.13)+                                                                                                                                                                                                                                                                                            |                                                                                                                               |
| <b>Px</b>     | Cptr ophth dx img post segmt (92134)*<br>Postop follow-up visit (99024)*<br>Vision item or service, miscellaneous (V2799)*                                                                                                                                                                                                                   |                                                                                                                               |
| <b>Day 15</b> |                                                                                                                                                                                                                                                                                                                                              |                                                                                                                               |
| <b>VA</b>     | UC -0.4 (20/50)                                                                                                                                                                                                                                                                                                                              | N/A                                                                                                                           |
| <b>IOP</b>    | 14                                                                                                                                                                                                                                                                                                                                           | 12                                                                                                                            |
| <b>Dx</b>     | N/A                                                                                                                                                                                                                                                                                                                                          | Acute endophthalmitis (1493002)<br>Acute endophthalmitis (360.01)<br>Unspecified purulent endophthalmitis, left eye (H44.002) |
|               | Artificial lens in position (225899000)+<br>Lens capsule in pseudophakia finding (247072007)+<br>Artificial lens in situ (309523001)+<br>Unspecified glaucoma (365.9)+<br>Unspecified glaucoma (H40.9)+<br>Lens replaced by other means (V43.1)+<br>Presence of intraocular lens (Z96.1)+<br>Glaucoma (23986001)*<br>None (428341000124108)* |                                                                                                                               |
| <b>Px</b>     | Cptr ophth dx img post segmt (92134)                                                                                                                                                                                                                                                                                                         | N/A                                                                                                                           |

|               |                                                                                                                                                                                                                                                                                                                                                                                                    |                                                                                                                               |
|---------------|----------------------------------------------------------------------------------------------------------------------------------------------------------------------------------------------------------------------------------------------------------------------------------------------------------------------------------------------------------------------------------------------------|-------------------------------------------------------------------------------------------------------------------------------|
|               | Eye exam&tx estab pt 1/>vst (92014)*                                                                                                                                                                                                                                                                                                                                                               |                                                                                                                               |
| <b>Day 22</b> |                                                                                                                                                                                                                                                                                                                                                                                                    |                                                                                                                               |
| <b>VA</b>     | UC -0.4 (20/50)                                                                                                                                                                                                                                                                                                                                                                                    | N/A                                                                                                                           |
| <b>IOP</b>    | 14                                                                                                                                                                                                                                                                                                                                                                                                 | 11                                                                                                                            |
| <b>Dx</b>     | N/A                                                                                                                                                                                                                                                                                                                                                                                                | Acute endophthalmitis (1493002)<br>Acute endophthalmitis (360.01)<br>Unspecified purulent endophthalmitis, left eye (H44.002) |
|               | Artificial lens in position (225899000)+<br>Lens capsule in pseudophakia finding (247072007)+<br>Artificial lens in situ (309523001)+<br>Unspecified glaucoma (365.9)+<br>Unspecified glaucoma (H40.9)+<br>Lens replaced by other means (V43.1)+<br>Presence of intraocular lens (Z96.1)+<br>Glaucoma (23986001)*<br>Preproliferative diabetic retinopathy (312905005)*<br>None (428341000124108)* |                                                                                                                               |
| <b>Px</b>     | N/A                                                                                                                                                                                                                                                                                                                                                                                                | Ophth us b w/non-quant a (76512)                                                                                              |
|               | Eye exam&tx estab pt 1/>vst (92014)*                                                                                                                                                                                                                                                                                                                                                               |                                                                                                                               |
| <b>Day 26</b> |                                                                                                                                                                                                                                                                                                                                                                                                    |                                                                                                                               |
| <b>VA</b>     | UC -0.48 (20/60)<br>BC -0.18 (20/30)<br>BC -0.3 (20/40)                                                                                                                                                                                                                                                                                                                                            | UC - 3 (HM)                                                                                                                   |
| <b>IOP</b>    | N/A                                                                                                                                                                                                                                                                                                                                                                                                | N/A                                                                                                                           |
| <b>Dx</b>     | Age-related nuclear cataract, bilateral (H25.13)+<br>Presence of intraocular lens (Z96.1)+                                                                                                                                                                                                                                                                                                         |                                                                                                                               |
| <b>Px</b>     | Postop follow-up visit (99024)*                                                                                                                                                                                                                                                                                                                                                                    |                                                                                                                               |
| <b>Day 32</b> |                                                                                                                                                                                                                                                                                                                                                                                                    |                                                                                                                               |
| <b>VA</b>     | N/A                                                                                                                                                                                                                                                                                                                                                                                                | N/A                                                                                                                           |
| <b>IOP</b>    | N/A                                                                                                                                                                                                                                                                                                                                                                                                | N/A                                                                                                                           |
| <b>Dx</b>     | Presbyopia (367.4)*<br>Presbyopia (H52.4)*                                                                                                                                                                                                                                                                                                                                                         |                                                                                                                               |
| <b>Px</b>     | Vision item or service, miscellaneous (V2799)*                                                                                                                                                                                                                                                                                                                                                     |                                                                                                                               |

| Day 36     |                                                                                                                                                                                                                                                                                                                                              |                                                                                                                                                                                                                                                                                                                                                                                                                                                                        |
|------------|----------------------------------------------------------------------------------------------------------------------------------------------------------------------------------------------------------------------------------------------------------------------------------------------------------------------------------------------|------------------------------------------------------------------------------------------------------------------------------------------------------------------------------------------------------------------------------------------------------------------------------------------------------------------------------------------------------------------------------------------------------------------------------------------------------------------------|
| <b>VA</b>  | UC -0.4 (20/50)                                                                                                                                                                                                                                                                                                                              | N/A                                                                                                                                                                                                                                                                                                                                                                                                                                                                    |
| <b>IOP</b> | 16                                                                                                                                                                                                                                                                                                                                           | 9                                                                                                                                                                                                                                                                                                                                                                                                                                                                      |
| <b>Dx</b>  | N/A                                                                                                                                                                                                                                                                                                                                          | Acute endophthalmitis (1493002)<br>Musca volitans (15013002)<br>Floaters in visual field (162278001)<br>Acute endophthalmitis (360.01)<br>Other vitreous opacities (379.24)<br>Vitreous snowball (417393008)<br>Vitreous opacities (422061002)<br>Other vitreous opacities, left eye (H43.392)<br>Unspecified purulent endophthalmitis, left eye (H44.002)                                                                                                             |
|            | Artificial lens in position (225899000)+<br>Glaucoma (23986001)+<br>Lens capsule in pseudophakia finding (247072007)+<br>Artificial lens in situ (309523001)+<br>Unspecified glaucoma (365.9)+<br>Unspecified glaucoma (H40.9)+<br>Lens replaced by other means (V43.1)+<br>Presence of intraocular lens (Z96.1)+<br>None (428341000124108)* |                                                                                                                                                                                                                                                                                                                                                                                                                                                                        |
| <b>Px</b>  | N/A                                                                                                                                                                                                                                                                                                                                          | Ophth us b w/non-quant a (76512)                                                                                                                                                                                                                                                                                                                                                                                                                                       |
|            | Eye exam&tx estab pt 1/>vst (92014)*                                                                                                                                                                                                                                                                                                         |                                                                                                                                                                                                                                                                                                                                                                                                                                                                        |
| Day 56     |                                                                                                                                                                                                                                                                                                                                              |                                                                                                                                                                                                                                                                                                                                                                                                                                                                        |
| <b>VA</b>  | N/A                                                                                                                                                                                                                                                                                                                                          | N/A                                                                                                                                                                                                                                                                                                                                                                                                                                                                    |
| <b>IOP</b> | N/A                                                                                                                                                                                                                                                                                                                                          | N/A                                                                                                                                                                                                                                                                                                                                                                                                                                                                    |
| <b>Dx</b>  | N/A                                                                                                                                                                                                                                                                                                                                          | Acute endophthalmitis (1493002)<br>Musca volitans (15013002)<br>Floaters in visual field (162278001)<br>Primary hypotony (2251002)<br>Acute endophthalmitis (360.01)<br>Primary hypotony of eye (360.31)<br>Other vitreous opacities (379.24)<br>Vitreous snowball (417393008)<br>Vitreous opacities (422061002)<br>Other vitreous opacities, left eye (H43.392)<br>Unspecified purulent endophthalmitis, left eye (H44.002)<br>Primary hypotony of left eye (H44.442) |



|               |                                                                                                                                                                                                                                                                                                                                              |                                                                                                                                                                                                                                                                                                                                                            |
|---------------|----------------------------------------------------------------------------------------------------------------------------------------------------------------------------------------------------------------------------------------------------------------------------------------------------------------------------------------------|------------------------------------------------------------------------------------------------------------------------------------------------------------------------------------------------------------------------------------------------------------------------------------------------------------------------------------------------------------|
|               | Artificial lens in position (225899000)+<br>Glaucoma (23986001)+<br>Lens capsule in pseudophakia finding (247072007)+<br>Artificial lens in situ (309523001)+<br>Unspecified glaucoma (365.9)+<br>Unspecified glaucoma (H40.9)+<br>Lens replaced by other means (V43.1)+<br>Presence of intraocular lens (Z96.1)+                            |                                                                                                                                                                                                                                                                                                                                                            |
| <b>Px</b>     | N/A                                                                                                                                                                                                                                                                                                                                          | Removal of inner eye fluid (67036)                                                                                                                                                                                                                                                                                                                         |
| <b>Day 57</b> |                                                                                                                                                                                                                                                                                                                                              |                                                                                                                                                                                                                                                                                                                                                            |
| <b>VA</b>     | N/A                                                                                                                                                                                                                                                                                                                                          | N/A                                                                                                                                                                                                                                                                                                                                                        |
| <b>IOP</b>    | N/A                                                                                                                                                                                                                                                                                                                                          | N/A                                                                                                                                                                                                                                                                                                                                                        |
| <b>Dx</b>     | N/A                                                                                                                                                                                                                                                                                                                                          | Acute endophthalmitis (1493002)<br>Musca volitans (15013002)<br>Floaters in visual field (162278001)<br>Acute endophthalmitis (360.01)<br>Other vitreous opacities (379.24)<br>Vitreous snowball (417393008)<br>Vitreous opacities (422061002)<br>Other vitreous opacities, left eye (H43.392)<br>Unspecified purulent endophthalmitis, left eye (H44.002) |
|               | Artificial lens in position (225899000)+<br>Glaucoma (23986001)+<br>Lens capsule in pseudophakia finding (247072007)+<br>Artificial lens in situ (309523001)+<br>Unspecified glaucoma (365.9)+<br>Unspecified glaucoma (H40.9)+<br>Lens replaced by other means (V43.1)+<br>Presence of intraocular lens (Z96.1)+<br>None (428341000124108)* |                                                                                                                                                                                                                                                                                                                                                            |
| <b>Px</b>     | Postop follow-up visit (99024)*                                                                                                                                                                                                                                                                                                              |                                                                                                                                                                                                                                                                                                                                                            |

**Case 3:**

|              | Right eye                                                                                         | Left eye                                                                                        |
|--------------|---------------------------------------------------------------------------------------------------|-------------------------------------------------------------------------------------------------|
| <b>Day 0</b> |                                                                                                   |                                                                                                 |
| <b>VA</b>    | N/A                                                                                               | N/A                                                                                             |
| <b>IOP</b>   | N/A                                                                                               | N/A                                                                                             |
| <b>Dx</b>    | Age-related nuclear cataract, right eye (H25.11)                                                  | N/A                                                                                             |
|              | Regular astigmatism, unspecified eye (H52.229)*                                                   |                                                                                                 |
| <b>Px</b>    | Eye surgery procedure (66999)                                                                     | N/A                                                                                             |
|              | <b>Cataract surg w/iol 1 stage (66984)*</b><br>Ophthalmic biometry (92136)*                       |                                                                                                 |
| <b>Day 1</b> |                                                                                                   |                                                                                                 |
| <b>VA</b>    | UNK -0.1 (20/25)*                                                                                 |                                                                                                 |
| <b>IOP</b>   | 32                                                                                                | N/A                                                                                             |
| <b>Dx</b>    | Age-related nuclear cataract, right eye (H25.11)                                                  | Age-related nuclear cataract, left eye (H25.12)<br>Other vitreous opacities, left eye (H43.392) |
|              | Type 1 diabetes mellitus with proliferative diabetic retinopathy without macular edema (E10.359)* |                                                                                                 |
| <b>Px</b>    | None (None)*                                                                                      |                                                                                                 |
| <b>Day 4</b> |                                                                                                   |                                                                                                 |
| <b>VA</b>    | N/A                                                                                               | N/A                                                                                             |
| <b>IOP</b>   | N/A                                                                                               | N/A                                                                                             |
| <b>Dx</b>    | Age-related nuclear cataract, right eye (H25.11)                                                  | Age-related nuclear cataract, left eye (H25.12)<br>Other vitreous opacities, left eye (H43.392) |
|              | Type 1 diabetes mellitus with proliferative diabetic retinopathy without macular edema (E10.359)* |                                                                                                 |
| <b>Px</b>    | N/A                                                                                               | N/A                                                                                             |
| <b>Day 6</b> |                                                                                                   |                                                                                                 |
| <b>VA</b>    | N/A                                                                                               | BC -0 (20/20)                                                                                   |

|               |                                                                                                                                                         |                                                                                                                                                     |
|---------------|---------------------------------------------------------------------------------------------------------------------------------------------------------|-----------------------------------------------------------------------------------------------------------------------------------------------------|
|               | UNK -0 (20/20)*<br>UNK -0.3 (20/40)*                                                                                                                    |                                                                                                                                                     |
| <b>IOP</b>    | 20                                                                                                                                                      | 17                                                                                                                                                  |
| <b>Dx</b>     | Cataract extraction status, right eye<br>(Z98.41)                                                                                                       | Age-related nuclear cataract, left eye<br>(H25.12)<br>Other vitreous opacities, left eye (H43.392)                                                  |
|               | None (AVPAY)*<br>Type 1 diabetes mellitus with proliferative diabetic retinopathy without macular edema<br>(E10.359)*                                   |                                                                                                                                                     |
| <b>Px</b>     | Eye exam establish patient (92012)+<br>Postop follow-up visit (99024)*<br>None (None)*                                                                  |                                                                                                                                                     |
| <b>Day 12</b> |                                                                                                                                                         |                                                                                                                                                     |
| <b>VA</b>     | N/A                                                                                                                                                     | N/A                                                                                                                                                 |
| <b>IOP</b>    | N/A                                                                                                                                                     | N/A                                                                                                                                                 |
| <b>Dx</b>     | N/A                                                                                                                                                     | Age-related nuclear cataract, left eye<br>(H25.12)                                                                                                  |
| <b>Px</b>     | N/A                                                                                                                                                     | N/A                                                                                                                                                 |
| <b>Day 28</b> |                                                                                                                                                         |                                                                                                                                                     |
| <b>VA</b>     | UNK -0 (20/20)*                                                                                                                                         |                                                                                                                                                     |
| <b>IOP</b>    | N/A                                                                                                                                                     | 30                                                                                                                                                  |
| <b>Dx</b>     | Cataract extraction status, right eye<br>(Z98.41)                                                                                                       | Age-related nuclear cataract, left eye<br>(H25.12)<br>Other vitreous opacities, left eye (H43.392)<br>Cataract extraction status, left eye (Z98.42) |
|               | Type 1 diabetes mellitus with proliferative diabetic retinopathy without macular edema<br>(E10.359)*<br>Regular astigmatism, unspecified eye (H52.229)* |                                                                                                                                                     |
| <b>Px</b>     | N/A                                                                                                                                                     | Eye surgery procedure (66999)                                                                                                                       |
|               | <b>Cataract surg w/iol 1 stage (66984)+</b><br>Ophthalmic biometry (92136)+<br>None (None)*                                                             |                                                                                                                                                     |
| <b>Day 29</b> |                                                                                                                                                         |                                                                                                                                                     |
| <b>VA</b>     | UNK -0.18 (20/30)*                                                                                                                                      |                                                                                                                                                     |

|               |                                                                                                   |                                                                                               |
|---------------|---------------------------------------------------------------------------------------------------|-----------------------------------------------------------------------------------------------|
| <b>IOP</b>    | 17                                                                                                | 50                                                                                            |
| <b>Dx</b>     | Cataract extraction status, right eye (Z98.41)                                                    | Other vitreous opacities, left eye (H43.392)<br>Cataract extraction status, left eye (Z98.42) |
|               | Type 1 diabetes mellitus with proliferative diabetic retinopathy without macular edema (E10.359)* |                                                                                               |
| <b>Px</b>     | Postop follow-up visit (99024)*                                                                   |                                                                                               |
| <b>Day 34</b> |                                                                                                   |                                                                                               |
| <b>VA</b>     | UNK -0 (20/20)*                                                                                   |                                                                                               |
| <b>IOP</b>    | 16                                                                                                | 16                                                                                            |
| <b>Dx</b>     | Cataract extraction status, right eye (Z98.41)                                                    | Other vitreous opacities, left eye (H43.392)<br>Cataract extraction status, left eye (Z98.42) |
|               | Type 1 diabetes mellitus with proliferative diabetic retinopathy without macular edema (E10.359)* |                                                                                               |
| <b>Px</b>     | Postop follow-up visit (99024)*                                                                   |                                                                                               |
| <b>Day 35</b> |                                                                                                   |                                                                                               |
| <b>VA</b>     | N/A                                                                                               | N/A                                                                                           |
| <b>IOP</b>    | N/A                                                                                               | N/A                                                                                           |
| <b>Dx</b>     | Cataract extraction status, right eye (Z98.41)                                                    | Other vitreous opacities, left eye (H43.392)<br>Cataract extraction status, left eye (Z98.42) |
|               | Type 1 diabetes mellitus with proliferative diabetic retinopathy without macular edema (E10.359)* |                                                                                               |
| <b>Px</b>     | N/A                                                                                               | N/A                                                                                           |
| <b>Day 36</b> |                                                                                                   |                                                                                               |
| <b>VA</b>     | N/A                                                                                               | N/A                                                                                           |
| <b>IOP</b>    | N/A                                                                                               | N/A                                                                                           |
| <b>Dx</b>     | Cataract extraction status, right eye (Z98.41)                                                    | Other vitreous opacities, left eye (H43.392)<br>Cataract extraction status, left eye (Z98.42) |
|               | Type 1 diabetes mellitus with proliferative diabetic retinopathy without macular edema (E10.359)* |                                                                                               |
| <b>Px</b>     | N/A                                                                                               | N/A                                                                                           |
| <b>Day 41</b> |                                                                                                   |                                                                                               |

|               |                                                                                                                                                                                                                                                                                                                                                                                                                                                            |                                               |
|---------------|------------------------------------------------------------------------------------------------------------------------------------------------------------------------------------------------------------------------------------------------------------------------------------------------------------------------------------------------------------------------------------------------------------------------------------------------------------|-----------------------------------------------|
| <b>VA</b>     | UNK -0 (20/20)*<br>UNK -0.18 (20/30)*                                                                                                                                                                                                                                                                                                                                                                                                                      |                                               |
| <b>IOP</b>    | 14                                                                                                                                                                                                                                                                                                                                                                                                                                                         | 14                                            |
| <b>Dx</b>     | Cataract extraction status, right eye (Z98.41)                                                                                                                                                                                                                                                                                                                                                                                                             | Cataract extraction status, left eye (Z98.42) |
|               | Vitreous degeneration, bilateral (H43.813)+<br>Cystoid macular edema following cataract surgery, bilateral (H59.033)+<br>Type 1 diabetes mellitus with proliferative diabetic retinopathy without macular edema (E10.359)*                                                                                                                                                                                                                                 |                                               |
| <b>Px</b>     | Cptr ophth dx img post segmt (92134)*<br>Postop follow-up visit (99024)*                                                                                                                                                                                                                                                                                                                                                                                   |                                               |
| <b>Day 55</b> |                                                                                                                                                                                                                                                                                                                                                                                                                                                            |                                               |
| <b>VA</b>     | N/A                                                                                                                                                                                                                                                                                                                                                                                                                                                        | BC -0.1 (20/25)                               |
|               | UNK -0.18 (20/30)*<br>UNK -0.48 (20/60)*                                                                                                                                                                                                                                                                                                                                                                                                                   |                                               |
| <b>IOP</b>    | 20                                                                                                                                                                                                                                                                                                                                                                                                                                                         | 20                                            |
| <b>Dx</b>     | Cystoid macular edema following cataract surgery, right eye (H59.031)                                                                                                                                                                                                                                                                                                                                                                                      | Cataract extraction status, left eye (Z98.42) |
|               | Vitreous degeneration, bilateral (H43.813)+<br>Type 1 diabetes mellitus with proliferative diabetic retinopathy without macular edema (E10.359)*                                                                                                                                                                                                                                                                                                           |                                               |
| <b>Px</b>     | Eye exam&tx estab pt 1/>vst (92014)+<br>Cptr ophth dx img post segmt (92134)*<br>Postop follow-up visit (99024)*                                                                                                                                                                                                                                                                                                                                           |                                               |
| <b>Day 64</b> |                                                                                                                                                                                                                                                                                                                                                                                                                                                            |                                               |
| <b>VA</b>     | UC -0.3 (20/40)                                                                                                                                                                                                                                                                                                                                                                                                                                            | UC -0.3 (20/40)                               |
| <b>IOP</b>    | 17                                                                                                                                                                                                                                                                                                                                                                                                                                                         | 17                                            |
| <b>Dx</b>     | Senile corneal changes (371.41)+<br>Vitreous degeneration (379.21)+<br>Retinal neovascularization, unspecified, bilateral (H35.053)+<br>Vitreous hemorrhage, bilateral (H43.13)+<br>Lens replaced by other means (V43.1)+<br>Diabetes with ophthalmic manifestations, type II or unspecified type, not stated as uncontrolled (250.50)*<br>Artificial lens in situ (309523001)*<br>Diabetic macular edema (312912001)*<br>Diabetic disc edema (314537004)* |                                               |

|               |                                                                                                                                                                                                                                                                                                                                                                                                                                                                                                                                                                                                                                                                                                                                                                                                                                                                                                                                             |                  |
|---------------|---------------------------------------------------------------------------------------------------------------------------------------------------------------------------------------------------------------------------------------------------------------------------------------------------------------------------------------------------------------------------------------------------------------------------------------------------------------------------------------------------------------------------------------------------------------------------------------------------------------------------------------------------------------------------------------------------------------------------------------------------------------------------------------------------------------------------------------------------------------------------------------------------------------------------------------------|------------------|
|               | Proliferative diabetic retinopathy (362.02)*<br>Diabetic macular edema (362.07)*<br>Retinal neovascularization NOS (362.16)*<br>Vitreous hemorrhage (379.23)*<br>Cataract co-occurrent and due to diabetes mellitus (43959009)*<br>Diabetes mellitus - adult onset (44054006)*<br>Senile corneal changes (58749007)*<br>PDR (59276001)*<br>Vitreous degeneration (60189009)*<br>Neovascularisation of retina (61267008)*<br>Type 2 diabetes mellitus with proliferative diabetic retinopathy with macular edema (E11.351)*                                                                                                                                                                                                                                                                                                                                                                                                                  |                  |
| <b>Px</b>     | Injection eye drug (67028)+<br>Eye exam establish patient (92012)+<br>Dilat macular exam done (2021F)*<br>Dil retina exam interp rev (2022F)*<br>Macul result phy/qhp mng dm (5010F)*<br>Cptr ophth dx img post segmt (92134)*<br>Dilated macular or fundus exam performed, including documentation of the presence or absence of macular edema and level of severity of retinopathy (G8397)*<br>Eligible clinician attests to documenting in the medical record they obtained, updated, or reviewed the patient's current medications (G8427)*                                                                                                                                                                                                                                                                                                                                                                                             |                  |
| <b>Day 69</b> |                                                                                                                                                                                                                                                                                                                                                                                                                                                                                                                                                                                                                                                                                                                                                                                                                                                                                                                                             |                  |
| <b>VA</b>     | UC -0.18 (20/30)                                                                                                                                                                                                                                                                                                                                                                                                                                                                                                                                                                                                                                                                                                                                                                                                                                                                                                                            | UC -0.18 (20/30) |
| <b>IOP</b>    | 15                                                                                                                                                                                                                                                                                                                                                                                                                                                                                                                                                                                                                                                                                                                                                                                                                                                                                                                                          | 15               |
| <b>Dx</b>     | Senile corneal changes (371.41)+<br>Vitreous degeneration (379.21)+<br>Retinal neovascularization, unspecified, bilateral (H35.053)+<br>Vitreous hemorrhage, bilateral (H43.13)+<br>Unspecified purulent endophthalmitis, bilateral (H44.003)+<br>Lens replaced by other means (V43.1)+<br>Diabetes with ophthalmic manifestations, type II or unspecified type, not stated as uncontrolled (250.50)*<br>Artificial lens in situ (309523001)*<br>Diabetic macular edema (312912001)*<br>Diabetic disc edema (314537004)*<br>Purulent endophthalmitis, unspecified (360.00)*<br>Proliferative diabetic retinopathy (362.02)*<br>Diabetic macular edema (362.07)*<br>Retinal neovascularization NOS (362.16)*<br>Vitreous hemorrhage (379.23)*<br>Purulent endophthalmitis (41720003)*<br>Cataract co-occurrent and due to diabetes mellitus (43959009)*<br>Diabetes mellitus - adult onset (44054006)*<br>Senile corneal changes (58749007)* |                  |

|               |                                                                                                                                                                                                                                                                                                                                                                                                                                                                                                                                                                                                                                                                                                                                                                                                                                                                                                                                                                                                                                                                                                                                                                                                                       |                 |
|---------------|-----------------------------------------------------------------------------------------------------------------------------------------------------------------------------------------------------------------------------------------------------------------------------------------------------------------------------------------------------------------------------------------------------------------------------------------------------------------------------------------------------------------------------------------------------------------------------------------------------------------------------------------------------------------------------------------------------------------------------------------------------------------------------------------------------------------------------------------------------------------------------------------------------------------------------------------------------------------------------------------------------------------------------------------------------------------------------------------------------------------------------------------------------------------------------------------------------------------------|-----------------|
|               | <p>PDR (59276001)*<br/> Vitreous degeneration (60189009)*<br/> Neovascularisation of retina (61267008)*<br/> Type 2 diabetes mellitus with proliferative diabetic retinopathy with macular edema (E11.351)*</p>                                                                                                                                                                                                                                                                                                                                                                                                                                                                                                                                                                                                                                                                                                                                                                                                                                                                                                                                                                                                       |                 |
| <b>Px</b>     | <p>Dilat macular exam done (2021F)*<br/> Dil retina exam interp rev (2022F)*<br/> 7 field photo interp doc rev (2024F)*<br/> Eye image valid to dx rev (2026F)*<br/> Low risk for retinopathy (3072F)*<br/> Macul result phy/qhp mng dm (5010F)*<br/> Eye exam establish patient (92012)*<br/> Dilated macular or fundus exam performed, including documentation of the presence or absence of macular edema and level of severity of retinopathy (G8397)*<br/> Eligible clinician attests to documenting in the medical record they obtained, updated, or reviewed the patient's current medications (G8427)*</p>                                                                                                                                                                                                                                                                                                                                                                                                                                                                                                                                                                                                    |                 |
| <b>Day 70</b> |                                                                                                                                                                                                                                                                                                                                                                                                                                                                                                                                                                                                                                                                                                                                                                                                                                                                                                                                                                                                                                                                                                                                                                                                                       |                 |
| <b>VA</b>     | UC -0.18 (20/30)                                                                                                                                                                                                                                                                                                                                                                                                                                                                                                                                                                                                                                                                                                                                                                                                                                                                                                                                                                                                                                                                                                                                                                                                      | UC -0.3 (20/40) |
| <b>IOP</b>    | 19                                                                                                                                                                                                                                                                                                                                                                                                                                                                                                                                                                                                                                                                                                                                                                                                                                                                                                                                                                                                                                                                                                                                                                                                                    | 20              |
| <b>Dx</b>     | <p>Senile corneal changes (371.41)+<br/> Vitreous degeneration (379.21)+<br/> Retinal neovascularization, unspecified, bilateral (H35.053)+<br/> Vitreous hemorrhage, bilateral (H43.13)+<br/> Lens replaced by other means (V43.1)+<br/> Diabetes with ophthalmic manifestations, type II or unspecified type, not stated as uncontrolled (250.50)*<br/> Artificial lens in situ (309523001)*<br/> Mild non proliferative diabetic retinopathy (312903003)*<br/> Diabetic macular edema (312912001)*<br/> Diabetic disc edema (314537004)*<br/> Proliferative diabetic retinopathy (362.02)*<br/> Diabetic macular edema (362.07)*<br/> Retinal neovascularization NOS (362.16)*<br/> Unspecified iridocyclitis (364.3)*<br/> Vitreous hemorrhage (379.23)*<br/> Cataract co-occurrent and due to diabetes mellitus (43959009)*<br/> Diabetes mellitus - adult onset (44054006)*<br/> Senile corneal changes (58749007)*<br/> PDR (59276001)*<br/> Vitreous degeneration (60189009)*<br/> Neovascularisation of retina (61267008)*<br/> Anterior uveitis (77971008)*<br/> Type 2 diabetes mellitus with proliferative diabetic retinopathy with macular edema (E11.351)*<br/> Unspecified iridocyclitis (H20.9)*</p> |                 |

|           |                                     |                                     |
|-----------|-------------------------------------|-------------------------------------|
| <b>Px</b> | Eye exam establish patient (92012)* | Eye exam establish patient (92012)* |
|-----------|-------------------------------------|-------------------------------------|



**Case 4:**

|               | Right eye                            | Left eye                                               |
|---------------|--------------------------------------|--------------------------------------------------------|
| <b>Day 0</b>  |                                      |                                                        |
| <b>VA</b>     | N/A                                  | N/A                                                    |
| <b>IOP</b>    | N/A                                  | N/A                                                    |
| <b>Dx</b>     | N/A                                  | N/A                                                    |
| <b>Px</b>     | Cataract surg w/iol 1 stage (66984)* |                                                        |
| <b>Day 1</b>  |                                      |                                                        |
| <b>VA</b>     | UC -0 (20/20)                        | N/A                                                    |
| <b>IOP</b>    | 18                                   | N/A                                                    |
| <b>Dx</b>     | N/A                                  | N/A                                                    |
| <b>Px</b>     | Ophthalmic biometry (92136)+         |                                                        |
| <b>Day 14</b> |                                      |                                                        |
| <b>VA</b>     | N/A                                  | N/A                                                    |
| <b>IOP</b>    | N/A                                  | N/A                                                    |
| <b>Dx</b>     | N/A                                  | N/A                                                    |
| <b>Px</b>     | Cataract surg w/iol 1 stage (66984)+ |                                                        |
| <b>Day 15</b> |                                      |                                                        |
| <b>VA</b>     | UC -0 (20/20)                        | UC -0.7 (20/100)<br>BC -0.4 (20/50)                    |
| <b>IOP</b>    | N/A                                  | 15                                                     |
| <b>Dx</b>     | Diabetic macular edema (312912001)+  |                                                        |
| <b>Px</b>     | N/A                                  | N/A                                                    |
| <b>Day 16</b> |                                      |                                                        |
| <b>VA</b>     | UC -0 (20/20)                        | BC -1.3 (20/400)<br>UC -1 (20/200)<br>UC -1.6 (20/800) |
| <b>IOP</b>    | 15                                   | 15                                                     |

|               |                                                                                                                                   |                                                                                                                                                                                                          |
|---------------|-----------------------------------------------------------------------------------------------------------------------------------|----------------------------------------------------------------------------------------------------------------------------------------------------------------------------------------------------------|
| <b>Dx</b>     | N/A                                                                                                                               | Acute endophthalmitis (1493002)<br>Acute endophthalmitis (360.01)<br>None (428341000124108)<br>Unspecified purulent endophthalmitis (H44.00)<br>Unspecified purulent endophthalmitis, left eye (H44.002) |
|               | Preproliferative diabetic retinopathy (312905005)*<br>Diabetic macular edema (312912001)*                                         |                                                                                                                                                                                                          |
| <b>Px</b>     | N/A                                                                                                                               | Injection eye drug (67028)                                                                                                                                                                               |
|               | Office/outpatient visit new (99204)+<br>Injection, ceftazidime, per 500 mg (J0713)*<br>Injection, vancomycin hcl, 500 mg (J3370)* |                                                                                                                                                                                                          |
| <b>Day 17</b> |                                                                                                                                   |                                                                                                                                                                                                          |
| <b>VA</b>     | N/A                                                                                                                               | UC -0.6 (20/80)                                                                                                                                                                                          |
| <b>IOP</b>    | N/A                                                                                                                               | 14                                                                                                                                                                                                       |
| <b>Dx</b>     | Diabetic macular edema (312912001)+                                                                                               |                                                                                                                                                                                                          |
| <b>Px</b>     | N/A                                                                                                                               | N/A                                                                                                                                                                                                      |
| <b>Day 19</b> |                                                                                                                                   |                                                                                                                                                                                                          |
| <b>VA</b>     | N/A                                                                                                                               | UC -0.1 (20/25)<br>UC -0.5 (20/63)                                                                                                                                                                       |
| <b>IOP</b>    | N/A                                                                                                                               | 13                                                                                                                                                                                                       |
| <b>Dx</b>     | Diabetic macular edema (312912001)*                                                                                               |                                                                                                                                                                                                          |
| <b>Px</b>     | N/A                                                                                                                               | N/A                                                                                                                                                                                                      |
| <b>Day 21</b> |                                                                                                                                   |                                                                                                                                                                                                          |
| <b>VA</b>     | UC -0 (20/20)                                                                                                                     | UC -0.1 (20/25)                                                                                                                                                                                          |
| <b>IOP</b>    | 19                                                                                                                                | 18                                                                                                                                                                                                       |
| <b>Dx</b>     | N/A                                                                                                                               | None (428341000124108)<br>Unspecified purulent endophthalmitis, left eye (H44.002)                                                                                                                       |
| <b>Px</b>     | Office/outpatient visit est (99213)*                                                                                              |                                                                                                                                                                                                          |
| <b>Day 28</b> |                                                                                                                                   |                                                                                                                                                                                                          |

|               |                                                                                                                                                                                                                                                              |                                                                                    |
|---------------|--------------------------------------------------------------------------------------------------------------------------------------------------------------------------------------------------------------------------------------------------------------|------------------------------------------------------------------------------------|
| <b>VA</b>     | UC -0 (20/20)                                                                                                                                                                                                                                                | UC -0 (20/20)                                                                      |
| <b>IOP</b>    | 13                                                                                                                                                                                                                                                           | 16                                                                                 |
| <b>Dx</b>     | N/A                                                                                                                                                                                                                                                          | None (428341000124108)                                                             |
|               | Unspecified purulent endophthalmitis, bilateral (H44.003)+                                                                                                                                                                                                   |                                                                                    |
| <b>Px</b>     | Cptr ophth dx img post segmt (92134)*<br>Office/outpatient visit est (99213)*                                                                                                                                                                                |                                                                                    |
| <b>Day 30</b> |                                                                                                                                                                                                                                                              |                                                                                    |
| <b>VA</b>     | UC -0 (20/20)<br>UNK -0 (20/20)                                                                                                                                                                                                                              | UC -0 (20/20)<br>UNK -0 (20/20)                                                    |
| <b>IOP</b>    | 11                                                                                                                                                                                                                                                           | 14                                                                                 |
| <b>Dx</b>     | Diabetic macular edema (312912001)*                                                                                                                                                                                                                          |                                                                                    |
| <b>Px</b>     | N/A                                                                                                                                                                                                                                                          | N/A                                                                                |
| <b>Day 49</b> |                                                                                                                                                                                                                                                              |                                                                                    |
| <b>VA</b>     | UC -0 (20/20)<br>UNK -0 (20/20)                                                                                                                                                                                                                              | UC -0 (20/20)<br>UNK -0 (20/20)                                                    |
| <b>IOP</b>    | 14                                                                                                                                                                                                                                                           | 16                                                                                 |
| <b>Dx</b>     | Blepharitis, unspecified (373.00)<br>Blepharitis (41446000)<br>Unspecified blepharitis (H01.00)<br>None (H01.001 H01.002)                                                                                                                                    | N/A                                                                                |
|               | Office/outpatient visit est (99212)+<br>Bmi not documented and no reason is given (G8421)*<br>Eligible clinician attests to documenting in the medical record they obtained, updated, or reviewed the patient's current medications (G8427)*<br>None (None)* |                                                                                    |
| <b>Day 56</b> |                                                                                                                                                                                                                                                              |                                                                                    |
| <b>VA</b>     | UC -0 (20/20)                                                                                                                                                                                                                                                | UC -0 (20/20)                                                                      |
| <b>IOP</b>    | 18                                                                                                                                                                                                                                                           | 13                                                                                 |
| <b>Dx</b>     | N/A                                                                                                                                                                                                                                                          | None (428341000124108)<br>Unspecified purulent endophthalmitis, left eye (H44.002) |
|               | Dry eye syndrome of bilateral lacrimal glands (H04.123)+                                                                                                                                                                                                     |                                                                                    |

|           |                                                                               |
|-----------|-------------------------------------------------------------------------------|
| <b>Px</b> | Cptr ophth dx img post segmt (92134)*<br>Office/outpatient visit est (99213)* |
|-----------|-------------------------------------------------------------------------------|
