# Supplementary material
Source: PubMed Central journal article supplement (PMC8755857)
Supplement: NIHMS1732738-supplement-3.pdf [file NIHMS1732738-supplement-3.pdf]

Supplemental Table 1. International Classification of Diseases, Ninth Revision, Clinical Modification (ICD-9-CM); International Classification of Diseases, Tenth Revision, Clinical Modification (ICD-10-CM); Current Procedural Terminology (CPT), and Healthcare Common Procedure Coding System (HCPCS) codes used in analysis.

| Diagnoses                 | ICD-9-CM and ICD-10-CM Codes                                                                                                                                                                                                                                                                                                                                                    |
|---------------------------|---------------------------------------------------------------------------------------------------------------------------------------------------------------------------------------------------------------------------------------------------------------------------------------------------------------------------------------------------------------------------------|
| Endophthalmitis           | 098.42, 360.0*, 360.1*, H44.0*, H44.1*                                                                                                                                                                                                                                                                                                                                          |
| AMD                       | 362.50, 362.51, 362.52, H35.30, H35.31*, H35.32*                                                                                                                                                                                                                                                                                                                                |
| Diabetic Retinopathy      | 249.50, 249.51, 250.50, 250.51, 250.52, 250.53, 362.0*, E08.31*, E08.32*, E08.33*, E08.34*, E08.35*, E08.37*, E08.39, E09.31*, E09.32*, E09.33*, E09.34*, E09.35*, E09.37*, E09.39, E10.31*, E10.32*, E10.33*, E10.34*, E10.35*, E10.37*, E10.39*, E11.31*, E11.32*, E11.33*, E11.34*, E11.35*, E11.37*, E11.39*, E13.31*, E13.32*, E13.33*, E13.34*, E13.35*, E13.37*, E13.39* |
| Glaucoma                  | 365.1*, 365.2*, 365.3*, 365.4*, 365.5*, 365.6*, 365.7*, 365.9, H40.1*, H40.2*, H40.3*, H40.4*, H40.5*, H40.6*, H40.8*, H40.9                                                                                                                                                                                                                                                    |
| Procedures                | CPT and HCPCS Codes                                                                                                                                                                                                                                                                                                                                                             |
| Cataract Extraction       | 66982, 66984                                                                                                                                                                                                                                                                                                                                                                    |
| Endophthalmitis Therapies | 67015, 67028, J0713, J3370                                                                                                                                                                                                                                                                                                                                                      |

\* Asterisks indicate wild cards. For example 360.0\* could be 360.0 exactly but also 360.11, 360.12, 360.13, etc.

AMD: age-related macular degeneration
