# Supplementary material
Source: PubMed Central journal article supplement (PMC8755857)
Supplement: NIHMS1732738-supplement-4.pdf [file NIHMS1732738-supplement-4.pdf]

Supplemental Table 3. Cases of Postoperative Endophthalmitis Within 6 weeks following Cataract Surgery Diagnosed with or without Supporting Clinical Findings and Corresponding Odds Ratios of Developing Endophthalmitis by Surgery Group.

|                                                   |                         | Unilateral<br>N=1,712,590 <sup>1</sup> | DSBCS<br>N=3,695,440 <sup>1</sup> | DSBCS and<br>Unilateral<br>N=5,408,030 <sup>1</sup> | ISBCS<br>N=165,609 <sup>1</sup> | Total<br>N=5,573,639 <sup>1</sup> |
|---------------------------------------------------|-------------------------|----------------------------------------|-----------------------------------|-----------------------------------------------------|---------------------------------|-----------------------------------|
| Endophthalmitis<br>Diagnosis                      | Either Eye <sup>2</sup> | 1,436 (0.084%)                         | 2,440 (0.066%)                    | 3,876 (0.072%)                                      | 130 (0.078%)                    | 4,006 (0.072%)                    |
|                                                   | First Eye               | 1,436 (0.084%)                         | 782 (0.021%)                      | 2,218 (0.041%)                                      | 59 (0.036%)                     | 2,277 (0.041%)                    |
|                                                   | Second Eye <sup>3</sup> | -                                      | 1,715 (0.046%)                    | 1,715 (0.046%)                                      | 75 (0.045%)                     | 1,790 (0.046%)                    |
|                                                   | Both Eyes <sup>3</sup>  | -                                      | 57 (0.002%)                       | 57 (0.002%)                                         | 4 (0.002%)                      | 61 (0.002%)                       |
| Diagnosis with<br>Supporting<br>Clinical Findings | Either Eye <sup>2</sup> | 1,220 (0.071%)                         | 2,011 (0.054%)                    | 3,231 (0.060%)                                      | 108 (0.065%)                    | 3,339 (0.060%)                    |
|                                                   | First Eye               | 1,220 (0.071%)                         | 576 (0.016%)                      | 1,796 (0.033%)                                      | 46 (0.028%)                     | 1,842 (0.033%)                    |
|                                                   | Second Eye <sup>3</sup> | -                                      | 1,447 (0.039%)                    | 1,447 (0.039%)                                      | 62 (0.037%)                     | 1,509 (0.039%)                    |
|                                                   | Both Eyes <sup>3</sup>  | -                                      | 12 (0.0003%)                      | 12 (0.0003%)                                        | 0 (0.0%)                        | 12 (0.0003%)                      |

<sup>1</sup>Statistics presented: n (%)

<sup>2</sup>Patients had postoperative endophthalmitis in either their first and/or second surgery eye.

<sup>3</sup>Percentages taken out of the number of participants who had bilateral cataract surgery (n = 3,695,440, 165,609, and 3,861,049)

DSBCS, delayed sequential bilateral cataract surgery; ISBCS, immediate sequential bilateral cataract surgery; CI, confidence intervals
