# Supplementary material
Source: PubMed Central journal article supplement (PMC8755857)
Supplement: NIHMS1732738-supplement-5.pdf [file NIHMS1732738-supplement-5.pdf]

Supplemental Table 4. Comparison of Odds Ratios for Risk of Postoperative Endophthalmitis Between the ISBCS and DSBCS Groups.

| Duration of Postoperative Follow up for Endophthalmitis diagnosis |                                             | Odds Ratio <sup>1</sup> (95% CI), p value |                           |
|-------------------------------------------------------------------|---------------------------------------------|-------------------------------------------|---------------------------|
| 2 Weeks                                                           | Endophthalmitis Diagnosis                   | Either Eye <sup>2</sup>                   | 0.87 (0.68, 1.09), 0.24   |
|                                                                   |                                             | Second Eye                                | 0.63 (0.44, 0.85), 0.0043 |
|                                                                   | Diagnosis with Supporting Clinical Findings | Either Eye <sup>2</sup>                   | 0.86 (0.66, 1.11), 0.26   |
|                                                                   |                                             | Second Eye                                | 0.59 (0.40, 0.83), 0.0045 |
| 4 Weeks                                                           | Endophthalmitis Diagnosis                   | Either Eye <sup>2</sup>                   | 1.14 (0.94, 1.37), 0.16   |
|                                                                   |                                             | Second Eye                                | 0.90 (0.69, 1.14), 0.40   |
|                                                                   | Diagnosis with Supporting Clinical Findings | Either Eye <sup>2</sup>                   | 1.17 (0.95, 1.43), 0.13   |
|                                                                   |                                             | Second Eye                                | 0.91 (0.68, 1.18), 0.47   |
| 6 Weeks                                                           | Endophthalmitis Diagnosis                   | Either Eye <sup>2</sup>                   | 1.20 (1.0, 1.42), 0.047   |
|                                                                   |                                             | Second Eye                                | 1.00 (0.78, 1.25), 0.98   |
|                                                                   | Diagnosis with Supporting Clinical Findings | Either Eye <sup>2</sup>                   | 1.21 (0.99, 1.46), 0.053  |
|                                                                   |                                             | Second Eye                                | 0.99 (0.76, 1.26), 0.91   |

<sup>1</sup>For developing endophthalmitis following ISBCS relative to DSBCS based on logistic regression model adjusted for decade of life, sex, race, insurance, and history of age-related macular degeneration, diabetic retinopathy, and glaucoma

<sup>2</sup>Patients had postoperative endophthalmitis in either their first and/or second surgery eye.

DSBCS, delayed sequential bilateral cataract surgery; ISBCS, immediate sequential bilateral cataract surgery; CI, confidence intervals
