# Supplementary material
Source: PubMed Central journal article supplement (PMC8755857)
Supplement: NIHMS1732738-supplement-6.pdf [file NIHMS1732738-supplement-6.pdf]

Supplemental Table 2. Cases of Postoperative Endophthalmitis Within 2 weeks following Cataract Surgery Diagnosed with or without Supporting Clinical Findings and Corresponding Odds Ratios of Developing Endophthalmitis by Surgery Group.

|                                                   |                         | Unilateral<br>N=1,712,590 <sup>1</sup> | DSBCS<br>N=3,695,440 <sup>1</sup> | DSBCS and<br>Unilateral<br>N=5,408,030 <sup>1</sup> | ISBCS<br>N=165,609 <sup>1</sup> | Total<br>N=5,573,639 <sup>1</sup> |
|---------------------------------------------------|-------------------------|----------------------------------------|-----------------------------------|-----------------------------------------------------|---------------------------------|-----------------------------------|
| Endophthalmitis<br>Diagnosis                      | Either Eye <sup>2</sup> | 1,094 (0.064%)                         | 1,915 (0.052%)                    | 3,009 (0.056%)                                      | 74 (0.045%)                     | 3,083 (0.055%)                    |
|                                                   | First Eye               | 1,094 (0.064%)                         | 538 (0.015%)                      | 1,632 (0.030%)                                      | 39 (0.024%)                     | 1,671 (0.030%)                    |
|                                                   | Second Eye <sup>3</sup> | -                                      | 1,393 (0.038%)                    | 1,393 (0.038%)                                      | 38 (0.023%)                     | 1,431 (0.037%)                    |
|                                                   | Both Eyes <sup>3</sup>  | -                                      | 16 (0.0004%)                      | 16 (0.0004%)                                        | 3 (0.002%)                      | 19 (0.0005%)                      |
| Diagnosis with<br>Supporting<br>Clinical Findings | Either Eye <sup>2</sup> | 941 (0.055%)                           | 1,595 (0.043%)                    | 2,536 (0.047%)                                      | 61 (0.037%)                     | 2,597 (0.047%)                    |
|                                                   | First Eye               | 941 (0.055%)                           | 425 (0.012%)                      | 1,366 (0.025%)                                      | 31 (0.019%)                     | 1,397 (0.025%)                    |
|                                                   | Second Eye <sup>3</sup> | -                                      | 1,176 (0.032%)                    | 1,176 (0.032%)                                      | 30 (0.018%)                     | 1,206 (0.031%)                    |
|                                                   | Both Eyes <sup>3</sup>  | -                                      | 6 (0.0002%)                       | 6 (0.0002%)                                         | 0 (0.0%)                        | 6 (0.0002%)                       |

<sup>1</sup>Statistics presented: n (%)

<sup>2</sup>Patients had postoperative endophthalmitis in either their first and/or second surgery eye.

<sup>3</sup>Percentages taken out of the number of participants who had bilateral cataract surgery (n = 3,695,440, 165,609, and 3,861,049)

DSBCS, delayed sequential bilateral cataract surgery; ISBCS, immediate sequential bilateral cataract surgery; CI, confidence intervals
